# Supplementary material for: Auxin Response Factors (ARFs) are potential mediators of auxin action in tomato response to biotic and abiotic stress (Solanum lycopersicum)
Source: PubMed Central journal article supplement (PMC5831009; doi:10.1371/journal.pone.0193517), 2018-02-28
Supplement: pone.0193517.s001.pdf [file pone.0193517.s001.pdf]

## Supplementary Material

### Auxin Response Factors (ARFs) are potential mediators of auxin action in Tomato response to biotic and abiotic stress (*Solanum lycopersicum* L.)

Sarah Bouzroud<sup>1,3</sup>, Sandra Gouiaa<sup>1</sup>, Nan Hu<sup>1</sup>, Anne Bernadac<sup>1</sup>, Isabelle Mila<sup>2</sup>, Najib Bendaou<sup>3</sup>, AbdelAziz Smouni<sup>3</sup>, Mondher Bouzayen<sup>1</sup>, Mohamed Zouine<sup>1\*</sup>

\*Correspondence: Mohamed ZOUINE: [mohamed.zouine@ensat.fr](mailto:mohamed.zouine@ensat.fr)

**Supplementary Table S1:** Quantitative RT-PCR primers of *SlARF* genes, stress marker genes and the miRNA gene precursors

| Gene name       | Forward primer sequence  | Reverse primer sequence     |
|-----------------|--------------------------|-----------------------------|
| <i>SlARF1</i>   | TCTCCTTCATCATTCTCATACTG  | GAACCATTTCTCACCATAACC       |
| <i>SlARF2A</i>  | GCAAGGTCAAGAGTTATCGA     | CATTGGTTTCTCAGACAAGTC       |
| <i>SlARF2B</i>  | CACTTAATCCACTTCCAATACC   | TACAACACTACTTTGGATGAACCT    |
| <i>SlARF3</i>   | AATTGCAGTATCAGACTTTGG    | TCTAGATATCCCAGAACTAGGA      |
| <i>SlARF4</i>   | CATTATTGTTGGTGACTTTGTG   | GACCTTTGGAAACCTATTGG        |
| <i>SlARF5</i>   | CCTTCAGAGTTTGTCATTCCCT   | AACATCATTCCAAATCTCATAACC    |
| <i>SlARF6A</i>  | CCAACATATCCCTAGTACTTCAG  | GTGCCTGAGATATTAGTTGGT       |
| <i>SlARF6B</i>  | ACCCTCTAGTATCTTCATCCT    | TCCGAGACCTTTGTATTGTG        |
| <i>SlARF7A</i>  | TCAACTCCTCAAACATACT      | TGAACTATCCAAATAATCCATCTG    |
| <i>SlARF8A</i>  | TGACATCGAATGGAAATTCAG    | GTCTCTTAGCACTAACAAACAC      |
| <i>SlARF8B</i>  | GTCAGTCCGTGATCATAGAG     | GGAATCCAAGCTACAATTTCC       |
| <i>SlARF9A</i>  | ATCATTCAATCTCAAATCAAAGGT | CCTCATCATTGTCCTTCTTCAG      |
| <i>SlARF10A</i> | ATTCTCTGTGCCTAGATACTG    | CTATAAATGTGCCTAAACTTCCA     |
| <i>SlARF17</i>  | TGAAGTTGATGAAGTTACTATGAG | TCCTCCATTATTTCGCATCTG       |
| <i>SlARF18</i>  | AATCTACACTCGGCATTGTC     | AAGCTTCCTATCTTATCATTGGA     |
| <i>SlARF19</i>  | TGGTGGATGAATCTGTTGTC     | TACTTAGACAGCTCTGAACCT       |
| <i>SlARF24</i>  | TCATTGTTGGATGTTTCAAAGG   | GAAGTCTTGGAAAGTAGTATACTC    |
| <i>Actin</i>    | TGTCCCTATCTACGAGGGTTATGC | AGTTAAATCACGACCAGCAAGAT     |
| <i>C117</i>     | GGCAATTCATCTGAGTTGTCTGA  | CTATTTGATCGATGAAGTTTCTTTTCC |
| <i>PDCl</i>     | TCTTTGAGCACATTCAGAGG     | AACAGACCAACCAATAGATCCA      |
| <i>ACO1</i>     | AAGGGACTCCGCGCTCA        | AGTTGAAGGCCACTCACTTTGT      |
| <i>miR160</i>   | CCTGGATGCCAACTAAGAACAG   | GGTACCAACTAGGAAGAGTGTC      |
| <i>miR167a</i>  | TCCGAGCATGACCTAACCTT     | TCAAAACCCTACATCCCAA         |
| <i>miR167b</i>  | CAATTCTGAACCCTGGCCTA     | GACAGGTAAGGCTGCCACAT        |
| <i>miR167c</i>  | TGGATCGTGAACCCTAGCA      | GCACAATTAGACCCTTGTGTC       |
| <i>miR167d</i>  | GCCACATGATCTGATCTTTCCTC  | GCCAGCATGATCTAAACTTTCC      |
