# Supplementary material for: Auxin Response Factors (ARFs) are potential mediators of auxin action in tomato response to biotic and abiotic stress (Solanum lycopersicum)
Source: PubMed Central journal article supplement (PMC5831009; doi:10.1371/journal.pone.0193517), 2018-02-28
Supplement: pone.0193517.s002.pdf [file pone.0193517.s002.pdf]

## *Supplementary Material*

# **Auxin Response Factors (ARFs) are potential mediators of auxin action in Tomato response to biotic and abiotic stress (*Solanum lycopersicum* L.)**

**Sarah Bouzroud<sup>1,3</sup>, Sandra Gouiaa<sup>1</sup>, Nan Hu<sup>1</sup>, Anne Bernadac<sup>1</sup>, Isabelle Mila<sup>2</sup>, Najib Bendaou<sup>3</sup>, AbdelAziz Smouni<sup>3</sup>, Mondher Bouzayen<sup>1</sup>, Mohamed Zouine<sup>1\*</sup>**

**\*Correspondence:** Mohamed ZOUINE: [mohamed.zouine@ensat.fr](mailto:mohamed.zouine@ensat.fr)

**Supplementary Table S2:** *SIARFs* RNA levels in tomato leaves in the control plants and upon pathogen infections. The Data presented in this table were extracted from TOMEXPRESS database.

|                  | RIO GRANDE<br>tomato control<br>plants | RIO GRANDE<br>tomato leaves<br>exposed to<br><i>P.synrigae</i> | RIO GRANDE<br>tomato leaves<br>exposed to <i>P.putida</i> | RIO GRANDE<br>tomato leaves<br>exposed to<br><i>P.fluorescens</i> | RIO GRANDE tomato<br>leaves exposed to<br><i>A.tumefasciens</i> | RIO GRANDE<br>tomato leaves<br>exposed to Flagellin | CLN2777A<br>tomato control<br>plants | CLN2777A<br>tomato exposed to<br>YCV |
|------------------|----------------------------------------|----------------------------------------------------------------|-----------------------------------------------------------|-------------------------------------------------------------------|-----------------------------------------------------------------|-----------------------------------------------------|--------------------------------------|--------------------------------------|
| <i>SI-ARF1</i>   | 0,2732                                 | 0,2394                                                         | 0,3743                                                    | 0,3076                                                            | 0,274                                                           | 0,3095                                              | 0,4074                               | 0,295                                |
| <i>SI-ARF2A</i>  | 0,5404                                 | 0,3959                                                         | 0,3208                                                    | 0,3575                                                            | 0,6185                                                          | 0,3031                                              | 0,3766                               | 0,3227                               |
| <i>SI-ARF2B</i>  | 0,1982                                 | 0,1385                                                         | 0,1336                                                    | 0,1375                                                            | 0,1867                                                          | 0,143                                               | 0,1075                               | 0,0988                               |
| <i>SI-ARF3</i>   | 0,1208                                 | 0,1258                                                         | 0,1143                                                    | 0,1104                                                            | 0,1284                                                          | 0,1063                                              | 0,0823                               | 0,103                                |
| <i>SI-ARF4</i>   | 0,1415                                 | 0,09                                                           | 0,0529                                                    | 0,0728                                                            | 0,1772                                                          | 0,0444                                              | 0,3429                               | 0,1845                               |
| <i>SI-ARF5</i>   | 0,0097                                 | 0,0102                                                         | 0,0056                                                    | 0,0061                                                            | 0,0107                                                          | 0,0043                                              | 0,136                                | 0,0474                               |
| <i>SI-ARF6A</i>  | 0,0587                                 | 0,0505                                                         | 0,0548                                                    | 0,0669                                                            | 0,0508                                                          | 0,0789                                              | 0,0469                               | 0,0288                               |
| <i>SI-ARF6B</i>  | 0,1641                                 | 0,1247                                                         | 0,1364                                                    | 0,1546                                                            | 0,1478                                                          | 0,1322                                              | 0,0363                               | 0,0394                               |
| <i>SI-ARF7A</i>  | 0,112                                  | 0,086                                                          | 0,0704                                                    | 0,0855                                                            | 0,1127                                                          | 0,0776                                              | 0,083                                | 0,0823                               |
| <i>SI-ARF7B</i>  | 0,1164                                 | 0,0937                                                         | 0,0671                                                    | 0,0942                                                            | 0,116                                                           | 0,0893                                              | 0,0509                               | 0,0673                               |
| <i>SI-ARF8A</i>  | 0,3882                                 | 0,5074                                                         | 0,2481                                                    | 0,2766                                                            | 0,3797                                                          | 0,2815                                              | 0,2728                               | 0,254                                |
| <i>SI-ARF8B</i>  | 0,0539                                 | 0,0615                                                         | 0,0372                                                    | 0,0439                                                            | 0,0518                                                          | 0,0339                                              | 0,2788                               | 0,1072                               |
| <i>SI-ARF9A</i>  | 0,0028                                 | 0,0025                                                         | 0,0019                                                    | 0,0019                                                            | 0,0031                                                          | 0,0011                                              | 0,0551                               | 0,0236                               |
| <i>SI-ARF9B</i>  | 0,0499                                 | 0,0373                                                         | 0,0281                                                    | 0,0334                                                            | 0,0427                                                          | 0,0249                                              | 0,0314                               | 0,0245                               |
| <i>SI-ARF10A</i> | 0,0884                                 | 0,0588                                                         | 0,071                                                     | 0,0865                                                            | 0,0915                                                          | 0,0626                                              | 0,0497                               | 0,0516                               |
| <i>SI-ARF10B</i> | 0,0142                                 | 0,0071                                                         | 0,0074                                                    | 0,0087                                                            | 0,011                                                           | 0,0072                                              | 0,0103                               | 0,0123                               |
| <i>SI-ARF16A</i> | 0,066                                  | 0,0418                                                         | 0,0339                                                    | 0,0489                                                            | 0,0594                                                          | 0,0361                                              | 0,1024                               | 0,0797                               |
| <i>SI-ARF16B</i> | 0                                      | 0                                                              | 0                                                         | 0                                                                 | 0                                                               | 0                                                   | 0                                    | 0                                    |
| <i>SI-ARF17</i>  | 0,0171                                 | 0,0076                                                         | 0,0081                                                    | 0,0111                                                            | 0,0221                                                          | 0,0072                                              | 0,0167                               | 0,0149                               |
| <i>SI-ARF18</i>  | 0,1557                                 | 0,1865                                                         | 0,1854                                                    | 0,1524                                                            | 0,1445                                                          | 0,248                                               | 0,4036                               | 0,3645                               |
| <i>SI-ARF19</i>  | 0,1007                                 | 0,0759                                                         | 0,0636                                                    | 0,0722                                                            | 0,0835                                                          | 0,0865                                              | 0,054                                | 0,0697                               |
| <i>SI-ARF24</i>  | 0,0712                                 | 0,0786                                                         | 0,0649                                                    | 0,0725                                                            | 0,0624                                                          | 0,0592                                              | 0,0487                               | 0,0385                               |
