# Supplementary material for: Auxin Response Factors (ARFs) are potential mediators of auxin action in tomato response to biotic and abiotic stress (Solanum lycopersicum)
Source: PubMed Central journal article supplement (PMC5831009; doi:10.1371/journal.pone.0193517), 2018-02-28
Supplement: pone.0193517.s003.pdf [file pone.0193517.s003.pdf]

## Supplementary Material

# Auxin Response Factors (ARFs) are potential mediators of auxin action in Tomato response to biotic and abiotic stress (*Solanum lycopersicum* L.)

Sarah Bouzroud<sup>1,3</sup>, Sandra Gouiaa<sup>1</sup>, Nan Hu<sup>1</sup>, Anne Bernadac<sup>1</sup>, Isabelle Mila<sup>2</sup>, Najib Bendaou<sup>3</sup>, AbdelAziz Smouni<sup>3</sup>, Mondher Bouzayen<sup>1</sup>, Mohamed Zouine<sup>1\*</sup>

\*Correspondence: Mohamed ZOUINE: [mohamed.zouine@ensat.fr](mailto:mohamed.zouine@ensat.fr)

**Supplementary Table S3:** *Cis*-acting regulatory elements identified in the 5' regulatory sequences of tomato Auxin response factors gene family. The 2kb of 5' regulatory region was analyzed using the Place software.

| <i>Cis</i> -acting element | Sequence | Function                                                                                      | Reference               |
|----------------------------|----------|-----------------------------------------------------------------------------------------------|-------------------------|
| WBOXNTCHN48                | CTGACY   | « W box » Elicitor-responsive                                                                 | (Deb and Kundu 2015)    |
| WBOXTERF3                  | TGACY    | « W box », response to wounding                                                               | (Nishiuchi et al. 2004) |
| RAV1AAT                    | CAACA    | RAV1 binding site, cold responsiveness                                                        | (Guy 1999)              |
| MYB1AT                     | WAACAA   | Element involved in dehydration responsiveness                                                | (Abe et al. 2003)       |
| MYBCORE                    | CNGTTR   | Element involved in water stress response                                                     | (Abe et al. 2003)       |
| GT1GMSCAM4                 | GAAAAA   | Pathogenesis and salt-induced element                                                         | (Trivedi et al. 2013)   |
| CCAATBOX1                  | CCAAT    | HSE (Heat Shock Element)                                                                      | (Sohn et al. 2006)      |
| MYB2AT                     | TAACTG   | Element involved in response to water stress and ABA                                          | (Abe et al. 2003)       |
| MYB2CONSENSUSAT            | YAACKG   | MYB recognition site involved in dehydration and ABA response                                 | (Abe et al. 2003)       |
| MYCATERD1                  | CATGTG   | MYC binding site involved in response to dehydration and ABA                                  | (Abe et al. 2003)       |
| MYCATRD22                  | CACATG   | MYC binding site involved in response to dehydration and ABA                                  | (Abe et al. 1997)       |
| MYCCONSUSAT                | CANNTG   | <i>Cis</i> -acting regulatory element involved in early response to drought and ABA induction | (Dang et al. 2011)      |
