# Supplementary material for: Auxin Response Factors (ARFs) are potential mediators of auxin action in tomato response to biotic and abiotic stress (Solanum lycopersicum)
Source: PubMed Central journal article supplement (PMC5831009; doi:10.1371/journal.pone.0193517), 2018-02-28

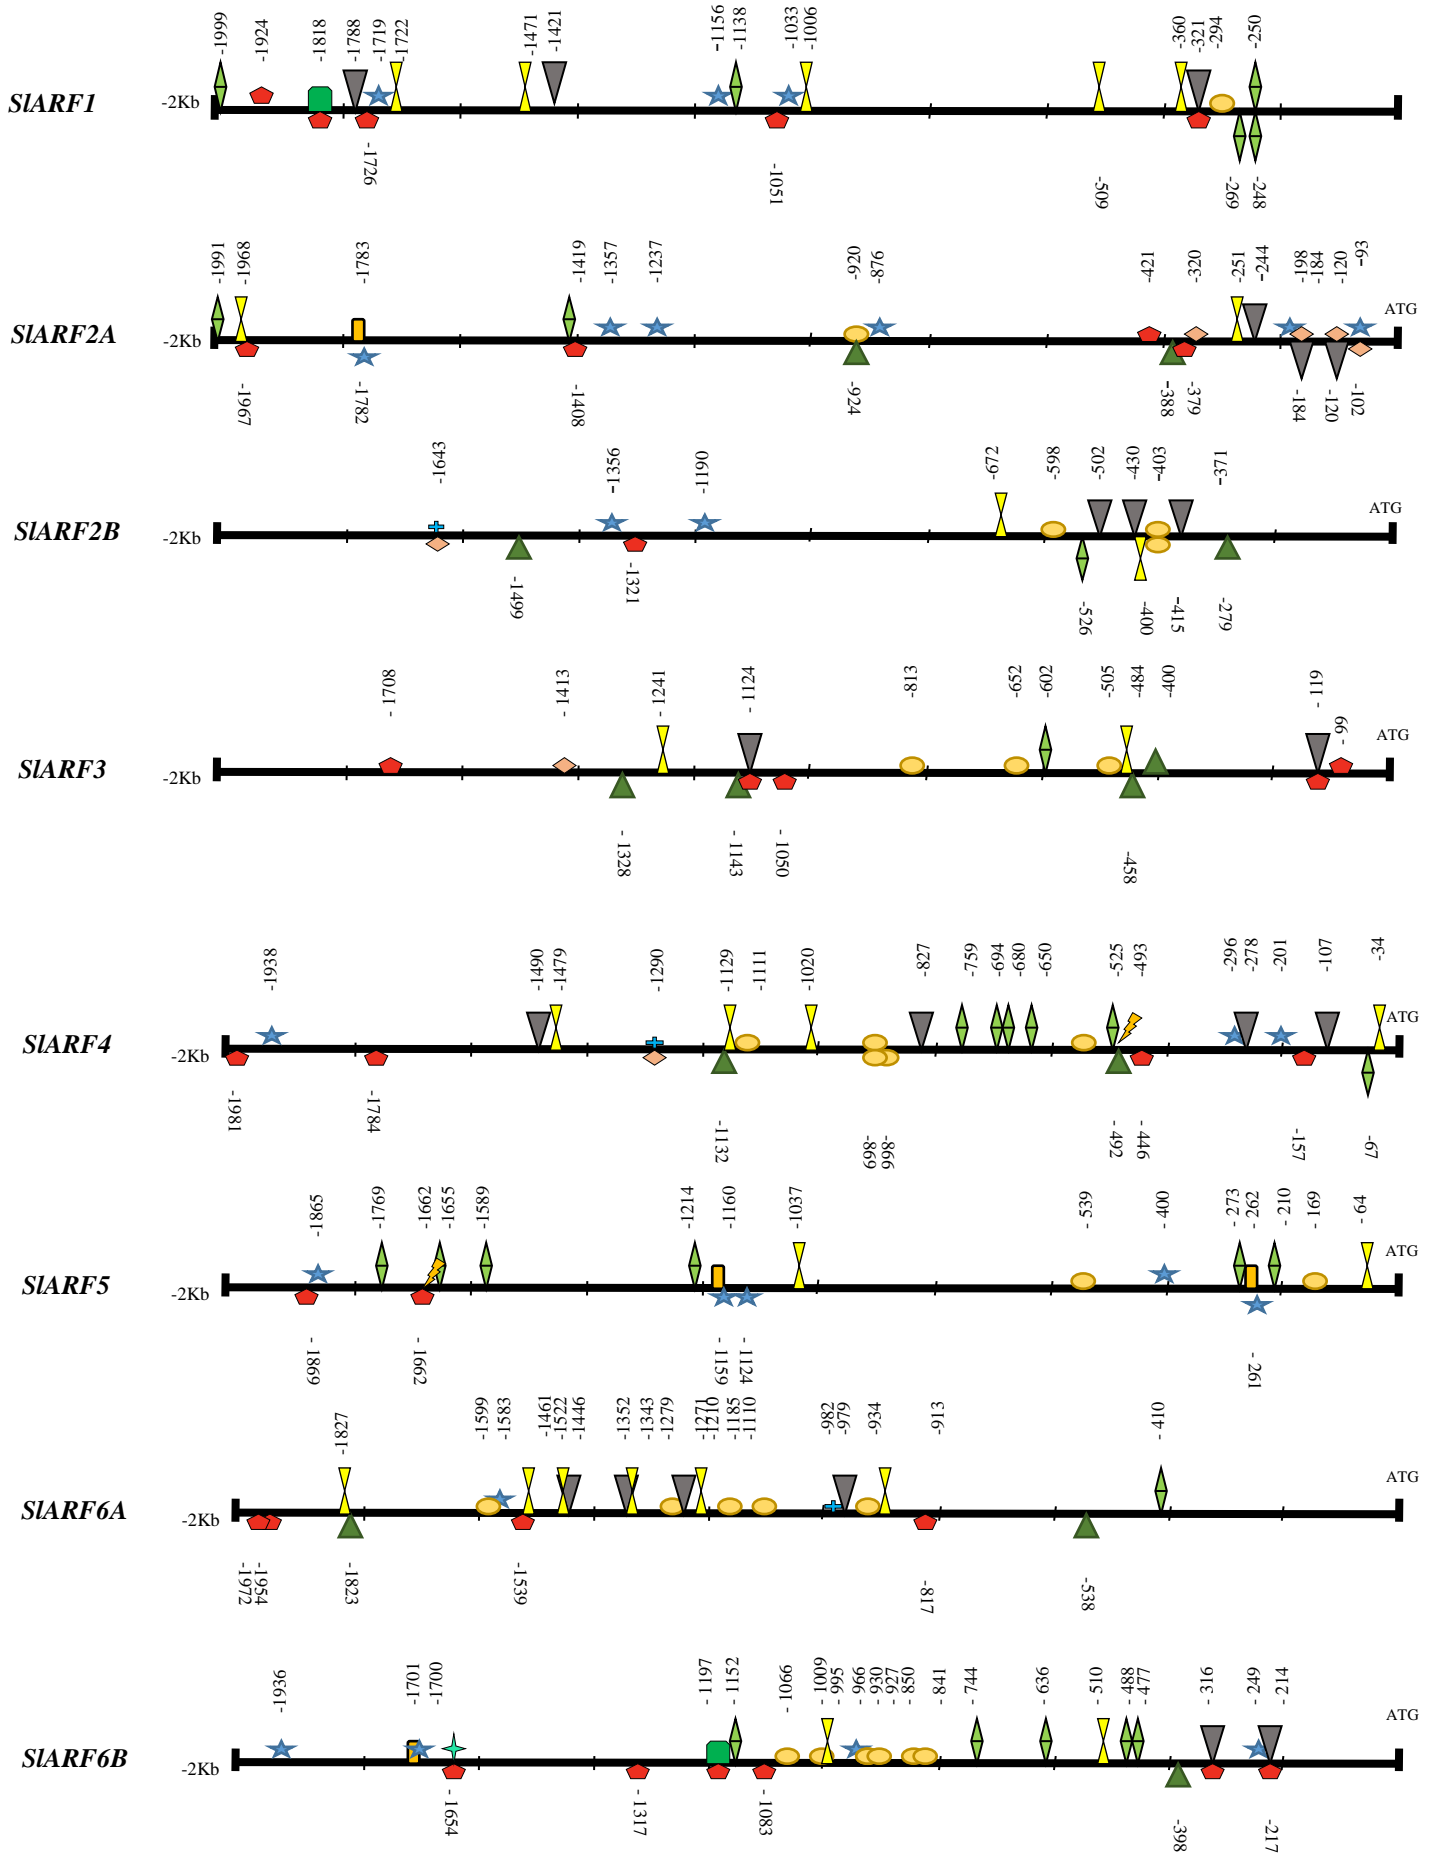

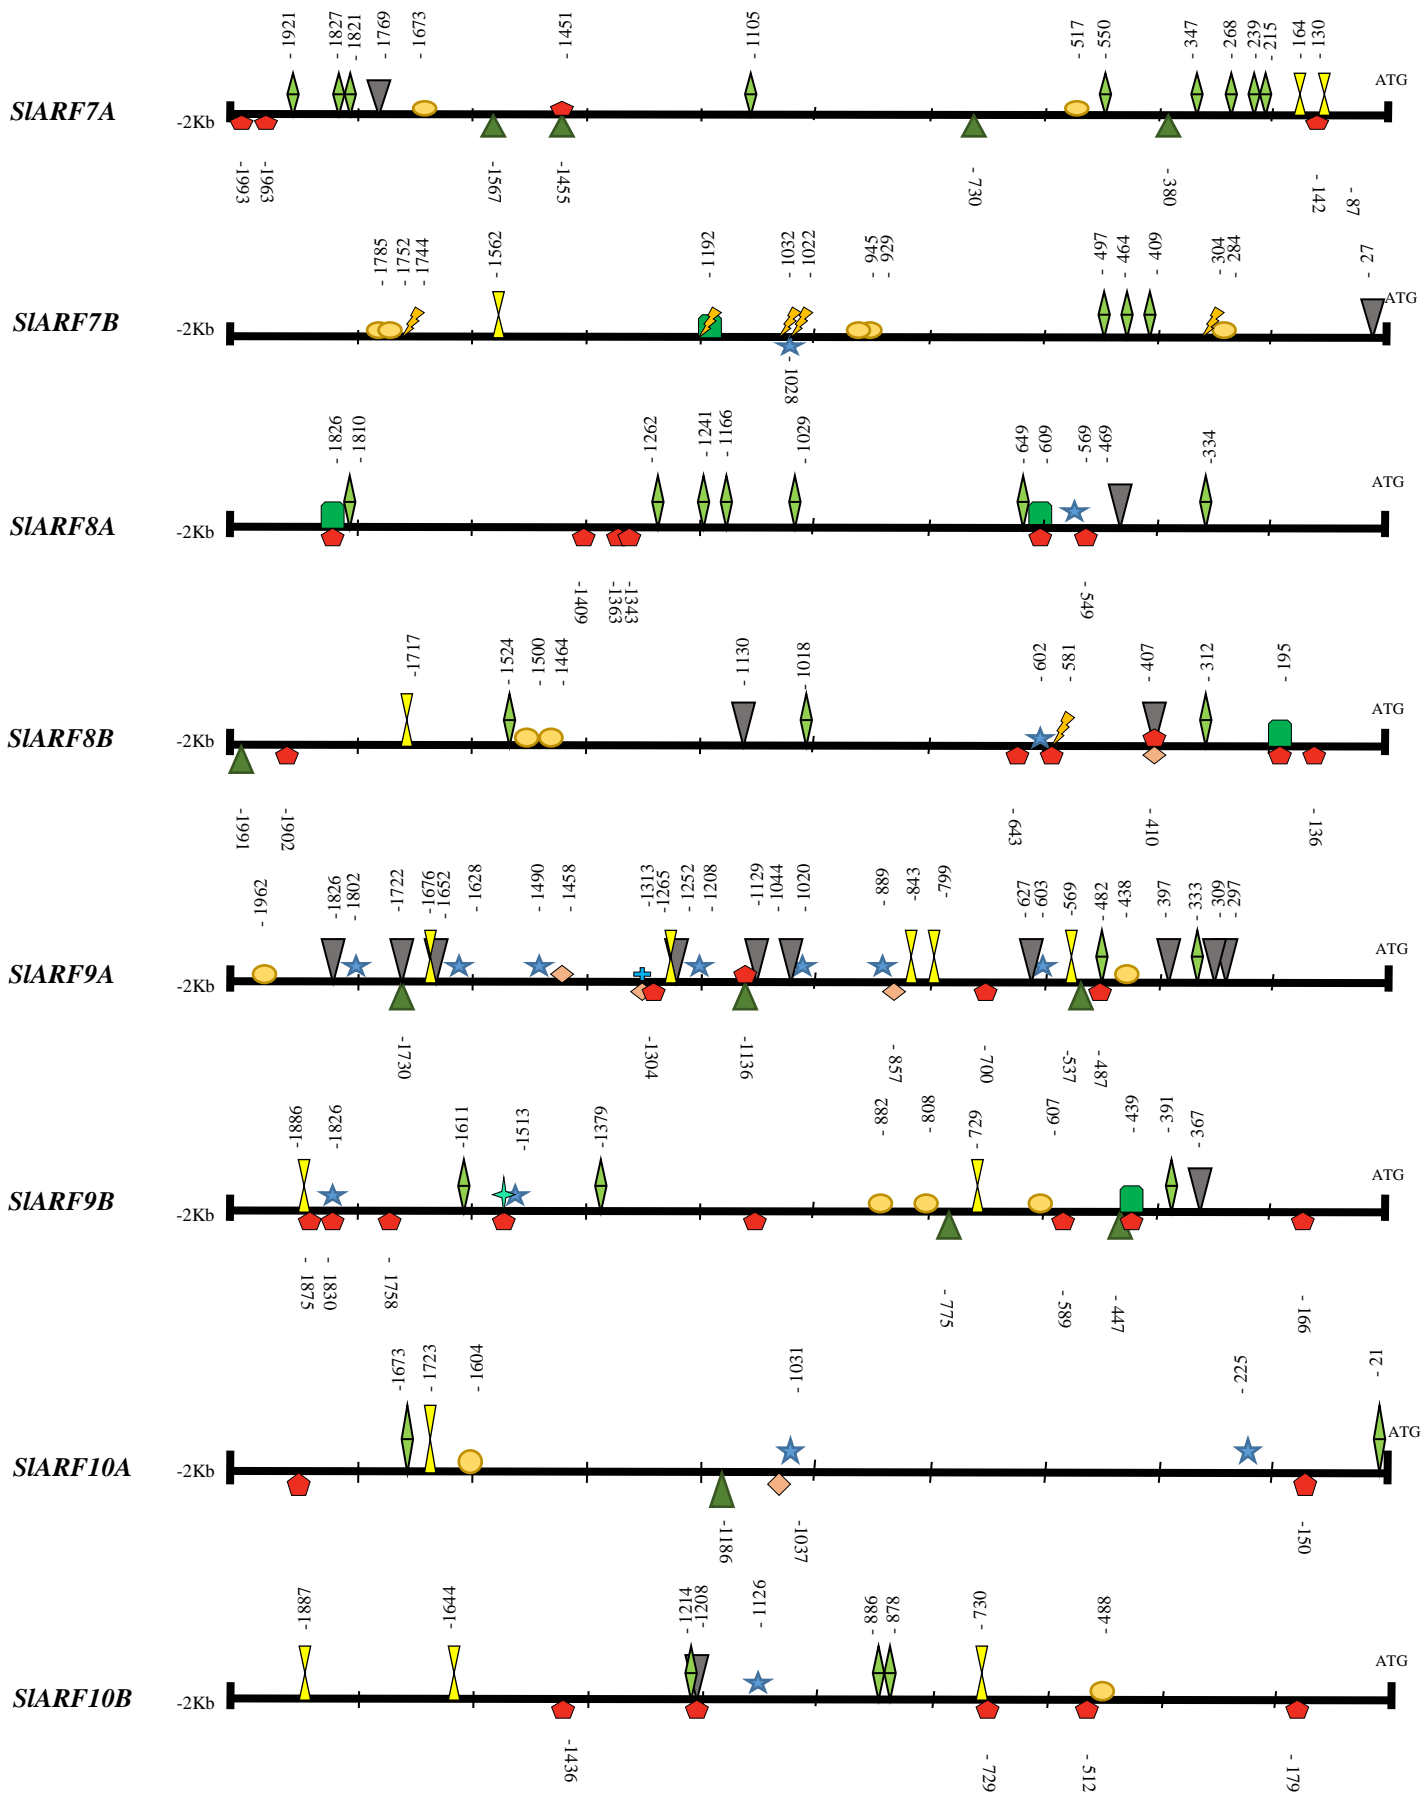

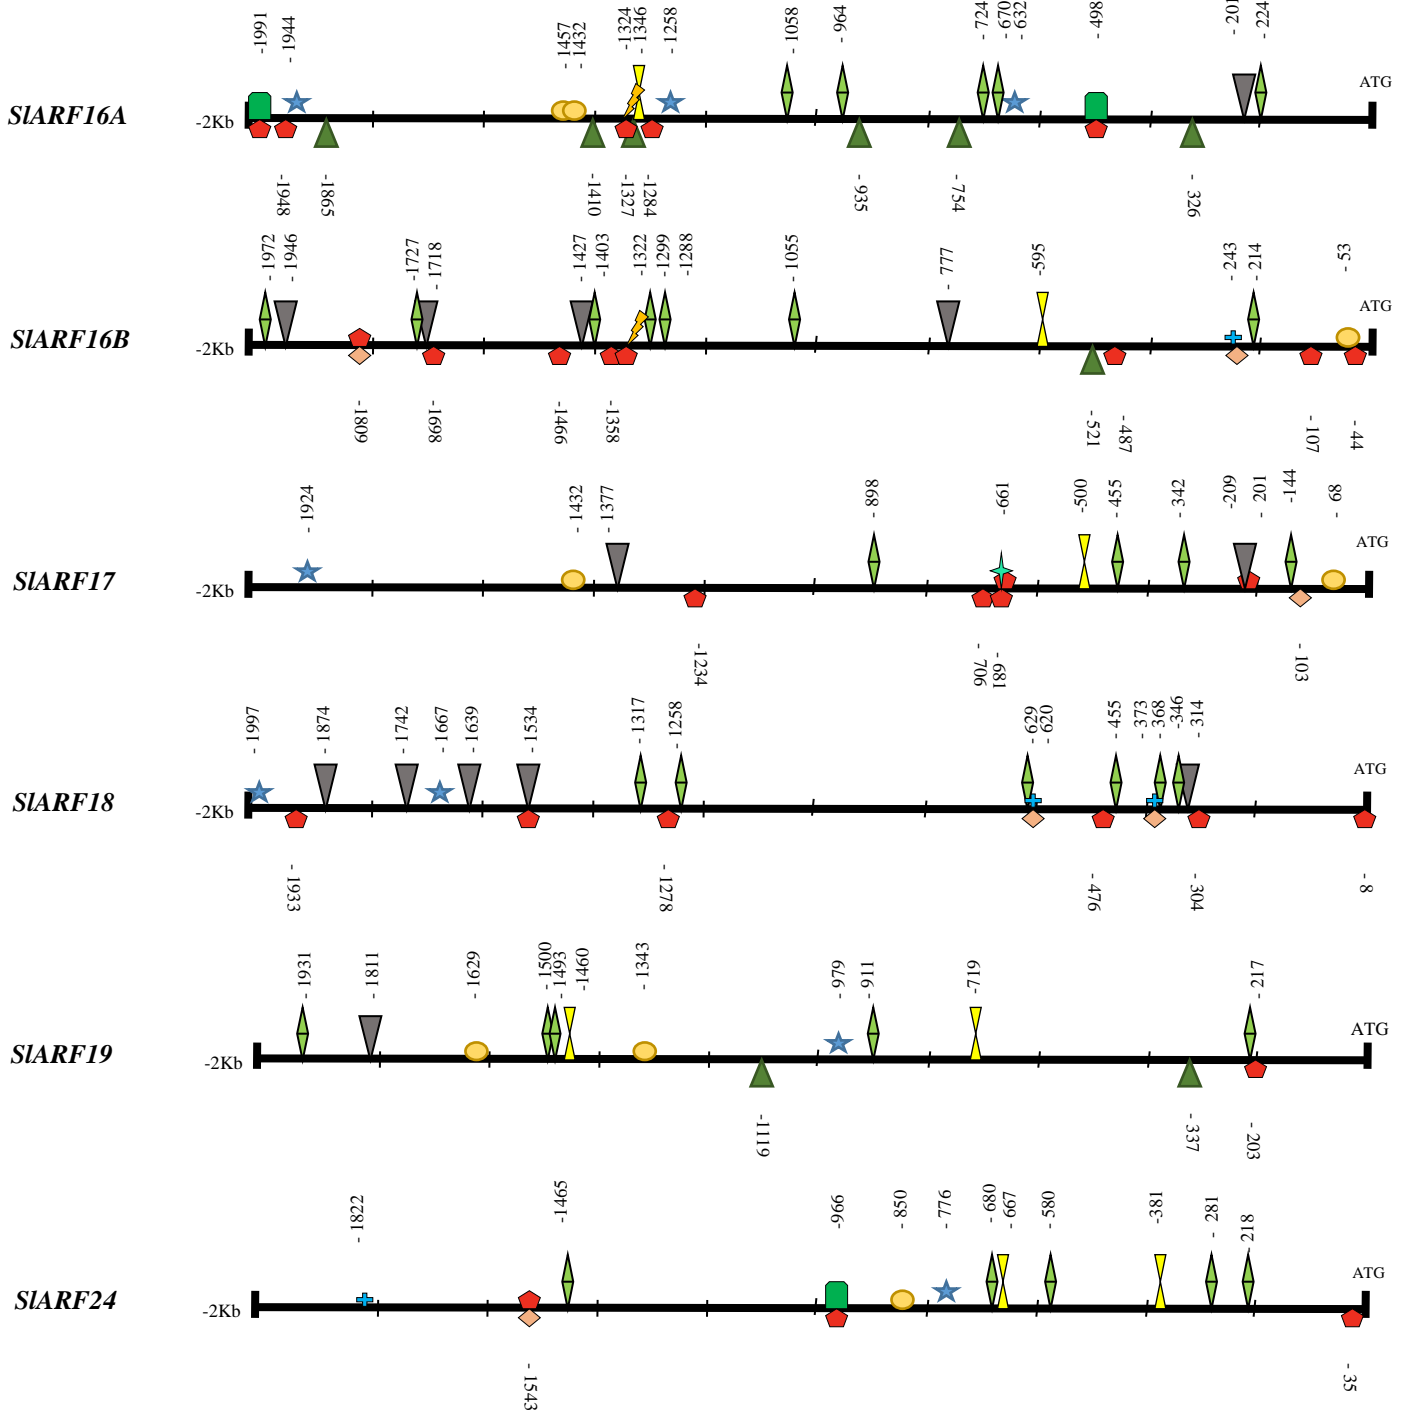

**Supplementary Figure S1:** Map of the 5' regulatory sequences of *Solanum lycopersicum* auxin response factors gene family. The consensus sequences corresponding to the various putative cis-elements are described in Supplementary Table S3. Positions are with respect to the first base of the translation start site. Symbols legend:

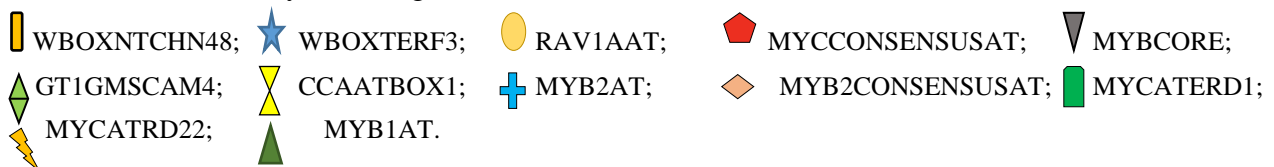

Supplement: pone.0193517.s004.pdf [file pone.0193517.s004.pdf]
